# Supplementary material for: Merging bio-optical data from Biogeochemical-Argo floats and models in marine biogeochemistry
Source: Copernicus journal article supplement (doi:10.5194/bg-2018-307), 2018-07-30
Supplement: Supplementary file [file bg-2018-307-AC3-supplement.pdf]

Dear Editor,

we thank both reviewers for the very useful comments. By following their suggestions we will certainly be able to improve the quality of our manuscript. Below a reply to all the points raised follows, where reviewers' comments are in black, whereas our replies are indented in blue.

To easily refer through the different reviews, we added a reference to each major point raised by the two Reviewers, labelled as "Rx.n", where "x" = n. of Reviewer, and "n" = n. of point.

## REVIEWER #1

Referee comment on "Merging bio-optical data from Biogeochemical-Argo floats and models in marine biogeochemistry" by Elena Terzić, Paolo Lazzari, Emanuele Organelli, Cosimo Solidoro, Stefano Salon, Fabrizio D'Ortenzio, and Pascal Conan

The paper discusses the results of the analysis of ~1300 Biogeochemical ARGO profiles (Temperature, salinity, Chlorophyll fluorescence, downwelling irradiance at three wavelengths and downwelling PAR) generated in different regions of the Mediterranean sea, though covering a large portion of it, by 31 profilers in the years 2012-2016. The analysis is based on the comparison among measured profiles and profiles derived by merging different bio-optical models and 1D biogeochemical simulations based on a 3D coupled biogeochemical model, the OGSTM-BFM (see text for refs). The wide scope motivation is that (P.2 L.22-24): Specific studies are required to demonstrate to what extent the assimilation of radiometric data can improve the model skill in simulating key biogeochemical variables (e.g. nutrients, primary productivity).

### R1.1

More specifically the authors want (P.2 L.32-34):

1) to show how it is possible to integrate BGC-Argo float bio-optical data and a simple 1-D model to investigate chlorophyll vertical dynamics; 2) [how] to use such a tool on a sufficiently large data set in order to test different bio-optical models

The text is unclear on a few key issues related to the protocol followed for the simulations (see below). Each simulated profile is generated using the vertical distributions of physical and chemical variables without considering horizontal processes, as the authors write on P.4 L.13-15 ..therefore implying that mass exchanges due to horizontal diffusion and baroclinic components of the (upper ocean) advection field are assumed to be smaller compared to vertical processes and biogeochemical dynamics. The impact of this assumption depends on the time scale of integration and on what are the initial conditions of each run, which is not clearly explained.

The time scale of the simulations corresponds to the typical length of time-series provided by the BGC-Argo float during the period 2012-2016 (11 months on average). The initial conditions of each simulation, carried out by the OGSTM-BFM coupled physical-biogeochemical model, are provided by the outputs of the reanalyses of the MedBFM model system (composed by the OGSTM-BFM and the 3DVarBio assimilation scheme for surface chlorophyll from satellite, reanalyses released within the Copernicus Marine Environment Monitoring Services) at the corresponding spatial and temporal points of the float deployment. After the initialization, the model evolves without further assimilation of biogeochemical data from the 3D model, and it is not reinitialized. The simulation setup will be more extensively described in the revised version of our manuscript.

We agree with the reviewer that the time scales are important. In particular, we hypothesize that in the experiments considered, several forcings like PAR and mixing are most important on the short time scales, whilst other forcings (related to lateral advection of nutrients, for example) act on longer time scales by the modulation of subsurface nutrients inventories. However, we think that an extensive analysis of other mechanisms acting on the horizontal plane or along isopycnal surfaces interacting with the float trajectory is beyond the scopes of our work. In any case, the analysis of the discrepancies between the 1D model results and the BGC-Argo float data can support the idea that when model and observations significantly disagree, physical and biogeochemical interactions not related to vertical processes may have a substantial role in the representation of the chlorophyll characteristics, not fully resolved by our 1D model framework.

### R1.2

A complementary scope is (P.5 L.13-14) ..[to assess] the possibility of using biogeochemical models also when [underwater] PAR measurements are not available, [comparing] the skill of different bio-optical models, which it is generally the rule.

The indicator for testing the performance of the models is the DCM depth, that obtained by the simulations vs. the observed depth, while a minor relevance is given to the DCM amplitude.

The main results of the study are: 1. an assessment of the performance of different formulations and/or parametrizations of the light penetration in the water column in relation to the concentrations of optically active components and 2. that PAR is more important than mixing and nutrients in determining the capability of the model in reproducing in situ chlorophyll profiles.

Indeed, testing different formulations and parametrizations in a model is useful not only to find the best performing model but, more importantly, to analyze the interplay among different mechanisms in generating observed pattern or dynamics.

To better illustrate the effects of the parameterizations on the model indicators, we performed a number of experiments. In the first experiment we partitioned the BGC-Argo floats in couples: each couple is composed by one BGC-Argo float

belonging to the western basin and one to the eastern basin, by random selection. Then, for each couple, we switched the initial conditions for nutrients, which allows to estimate the impact on DCM depth. The results are shown in the following scatter plots (Fig. R1):

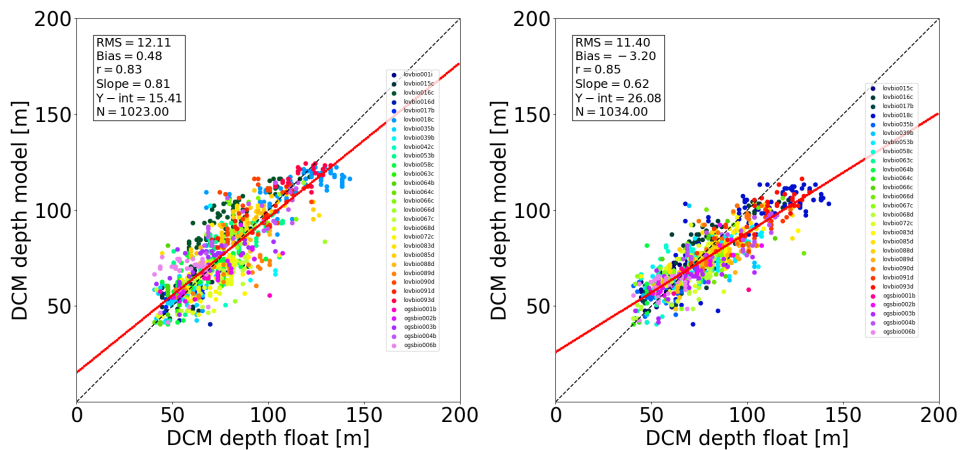

**Fig. R1.** Scatter plots of DCM depth derived for the REF simulation (left) and with the “East-West” switching technique described in the text (right).

The plots evidence how inverting the initialization of the nutrients does not significantly alter the results in terms of DCM depth. We obtain a reduction of the slope from 0.81 to 0.62, thus it seems that the role of nutrients is secondary with respect to light in DCM depth regulation.

Performing the same operation by switching light instead of nutrients is technically more difficult, however, we provided a second experiment to appraise the role of light (and other selected key parameters). This experiment consists in a sensitivity analysis following a similar technique as shown in Huisman et al. (2004). In particular, we selected two BGC-Argo floats (*lovbio018c* for the east Med and *lovbio067c* for the west Med) and a couple of parameters [Phosphate, Light] and then performed 21x21 simulations (per each float) applying bivariate perturbations. This technique allows to better understand the driving mechanisms for DCM depth variability. We propose to use this additional analysis to evaluate the model sensitivity and to add some considerations to the results in the revised version of our manuscript.

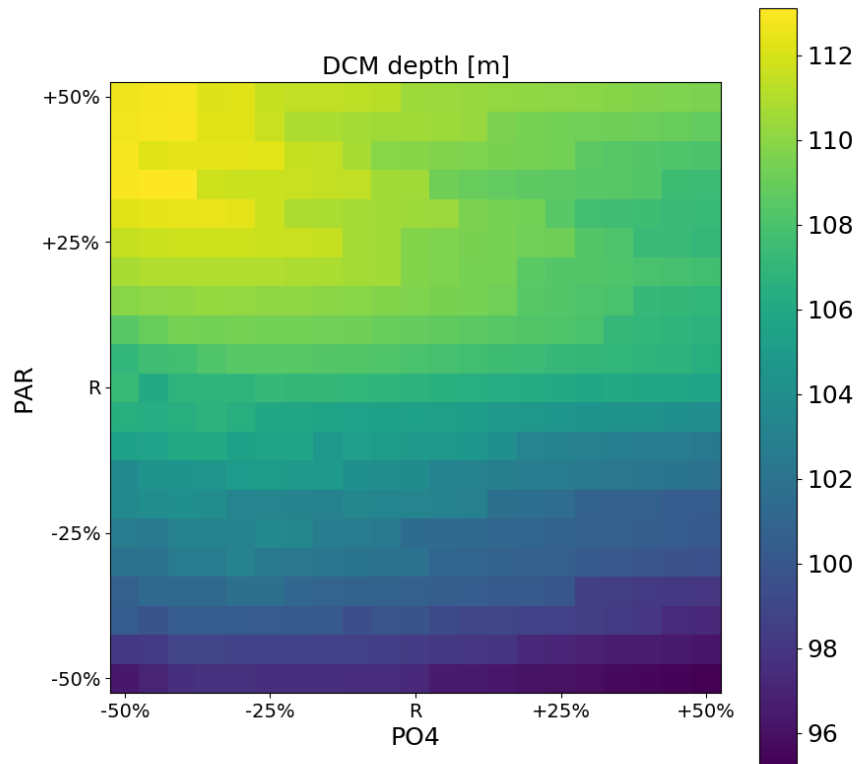

**Fig. R2.** Sensitivity analysis of DCM depth perturbing LIGHT and perturbing initial conditions of  $PO_4$  [both by an uniform factor] along the water column. ‘R’ marks the reference values. The BGC-Argo float here reported is the *lovbio018c*. Each pixel is a full simulation, for a total of 21x21 simulations. The DCM depth is averaged over the simulation period.

In particular, the plot reported in Fig.R2 shows how the DCM position is affected by light and nutrient ( $PO_4$ ) perturbations. As shown in Fig.R2, perturbing  $PO_4$  of 50% has a minor effect on DCM depth position, whilst perturbing light has a larger

impact. Same results hold in the case of the other BGC-Argo float considered (*lovbio067c*). The very same analysis will be carried out on the additional indicators like DCM width and DCM values, the analysis of this indicators has been suggested by the other reviewer.

### R1.3

This part is often lacking in the discussion. For example the reason why different optical models produce different depths of the DCM varying with the area is not discussed. More important, there is a key conceptual issue in the manuscript, at least from what I could grasp from its present version. The authors compare the chlorophyll vertical profiles, obtained from different bio-optical models and with different values of turbulent diffusivity, with those measured in situ, without discussing the impact on the profile of nutrients, phytoplankton loss due to grazing and all the other processes simulated by the OGSTM-BFM.

We focused on discussing the DCM depth because it is the indicator measured by the BGC-Argo floats that we principally considered in this manuscript. We do not have available synoptic data measured by the BGC-Argo floats (e.g. nutrient concentrations) to corroborate the other outputs produced by the model. Therefore, for variables different from chlorophyll, we can provide at most an evaluation of the impact the bio-optical models have on them. The additional impacts on nutrients and phytoplankton grazing are also driven by the same changes in the parameterizations selected. We assume that on the time scales of the simulation [11 months], the most important mechanisms (light, mixing) are included in the model, thus, the variability of simulated profiles of nutrients should be realistic. As an additional analysis, we plan to evaluate the impact of the different bio-optical models on the nutricline position as suggested by the reviewer. We will follow a procedure similar to what already done for the DCM, using specific definitions of the nutricline position (e.g. defining a threshold for the nutrient concentration in depth or for the derivative of the nutrient vertical profile) and showing how the bio-optical models differ with respect to the REF model.

### R1.4

I believe that the rationale for this is the assumption that the biogeochemical module is always the same and then any differences in the results would depend only on the change of the specific driver tested. Even ignoring any possible non-linearity in specific processes, e.g., the nitrogen dependence of the photoacclimation by phytoplankton, the best performance of the model in reproducing the depth of the DCM cannot be attributed only to the tested drivers since equally important processes are in the background and not discussed at all, besides some mention to phosphate which is substantiated only by the model outputs. This makes me thinking that the authors consider the 'geochemical' fields produced by the OGSTM-BFM as real data instead than simulated data. This might be a reasonable assumption for large scale patterns but it is a little weaker for daily simulations in single sites that are moved in time. The effectiveness of a bio-optical model should be tested against IOPs or AOPs, as it is already been done also for BGC-ARGO profilers, not via an end product, i.e., chlorophyll a, whose concentration depend on many other processes. This would also help in clarifying which mechanisms drive the differences reported in Figs. 10 through 12.

We agree with the reviewer and, as suggested, we propose to compare the skill of the models using directly the AOPs, in particular the attenuation depths of 10%, 50% and 100% of the signal and the threshold value reported by [Mignot et al., 2014] of 0.5 mol quanta/day. We propose to use the same Taylor and Target diagrams considered in the case of DCM depth, so we plan to integrate the information of DCM depth skill with the RAW information related to PAR sensor. Nonetheless, we think that it is important to keep also the comparison with the DCM depth because it is the end product we are mainly interested in.

### R1.5

In addition, it not clearly explained, or I might have missed where, if all the state variables simulated by the model were reset each day to the 3D model values for that day and that site, as one might guess from lines 30-33 on P.5 or if, as in a normal 1D simulations, they are produced by the model. In either case I guess some discrepancies should arise, which are neither mentioned nor discussed in the paper.

As explained before, the 1-D model is initialized with the 3-D model only at the first step of the simulation. We mention the fact that neglecting lateral inputs could produce effects that the present methodology cannot replicate. We do not want to stress the dependence on 3-D model configuration because a possible generic application carried out with this approach, e.g. based on the global ocean BGC-Argo float dataset, could be possibly performed independently from any 3D model, and the initialization for nutrients might be based on data available from climatology repositories.

### R1.6

While acknowledging the effort invested in the study it looks a bit empirical and I am not convinced that it adds new knowledge to the existing one. Besides solving a couple of issues mentioned in the detailed comments, I suggest to revise the paper analyzing in more detail what are the mechanisms driving the simulated differences and discussing in more detail the extent to which the OGSTM-BFM drives the DCM depth which is the prognostic variable that the author use to test the performance of the different sub-models tested.

We agree to further expand this part in order to make more evident the differences between the REF simulation and the alternative models in terms of skill and formulation. We will add additional indicators in the analysis of REF results (as mentioned in point R2.7). These indicators will be used for the bio-optical model comparison.

Detailed comments

Abstract (It should be substantially re-written. Following are some suggestions).

L.3-4 ...Data set comprised of ...Argo Floats does not seem correct. I suggest to rephrase as: The present work is based on a dataset comprised of 1314 0-1000 m vertical profiles of biogeochemical and optical data measured by 31 Biogeochemical (BGC) Argo floats in the Mediterranean Sea from 2012 to 2016. L.4 The data set was integrated in ...sounds a little confusing since the simulations are 1D. I suggest to rephrase as: 1-dimensional model simulations, using measured photosynthetically available radiation (PAR) profiles as light input, were then carried out for each profile along the trajectories of the floats. L.6-7 The simulations were aimed to be consistent with data measured by float sensors, especially in terms of the deep chlorophyll maximum (DCM) depth. I suggest to rephrase as: The simulations were aimed at reproducing the profiles measured by float sensors, especially for what the deep chlorophyll maximum (DCM) depth concerns. L.7-9 I suggest to rephrase as: We tested several light models to estimate their impact on modeled biogeochemical properties taking into account self-shading, derived from vertical chlorophyll distributions, and colored dissolved organic matter (CDOM) concentrations. L.9-11 I suggest to rephrase as: The results, corroborated by the comparison with in-situ BGC-Argo profiles, illustrate how PAR penetration and vertical mixing modulate the dynamics of primary producers along the water column. L.12 Highest? L.13 Simulation results show also that... L.14-15 After reading the paper I am not convinced that The approach here presented serves as a computationally smooth solution to analyse BGC-Argo floats data and to corroborate hypotheses on their spatio-temporal variability.

We agree to follow the reviewer's suggestions and modify the abstract accordingly

Intro

P.2 L.6 Density? More clear the high number of active BGC-Argos

We agree to correct these.

P.2 L.7 ...numerical experiments of that kind. Unclear. Better: to analyze the predicting capability of bio-optical models, if this is the scope

Ok

P.2 L.19 ones

Ok

P.2 L.6-24 To better clarify the scope of the study it would be better to invert the sequence of the arguments. If the scope is to demonstrate to what extent the assimilation of radiometric data can improve the model skill in simulating key biogeochemical variables (e.g. nutrients, primary productivity) which comes as a possible improvement of what already done and sketched before, then this statement should come first. Then all the motivations for using Med data as a test case. If, alternatively, the scope is to improve our understanding of Med functioning then then all the paragraph should be changed accordingly. Reading the manuscript the first possibility seems to hold true.

Ok, we agree to make this part more clear.

Methods

P.3 L.17 ...were then vertically interpolated to a resolution of 1 m in the upper 400 m. Do the authors mean 'fitted'? If the sampling resolution was 1 m why to interpolate them? What about the data below 250 m? Were they extrapolated?

Yes the data were fitted in order to be regularly spaced as in the case of the model, the data below 250 were extrapolated.

P.3 L.19-21 Could the authors be more explicit on which part of the Baird et al (2016) model they used and with which input variables? This can go in SI.

Ok, we will add more details concerning the correction applied to PAR.

P.3 L.21 A second approach. There is no first before.

The corrections we mention are related to the corrections of PAR from planar to scalar, the first is with the formula by Baird et al. (2016), the second is by means of constant correction, we will clarify the text accordingly.

P.3 L.25 please rephrase as: ...measure Chl a concentration using as a proxy its fluorescence emission in the red band (690 nm) after blue excitation at 470 nm (Holm-Hansen et al., 1965)

Ok, we agree to write the sentence this way.

P.3 L.27 remove it

Ok

P.5 L.20 ...levels

Ok

P.5 L.25 ...characterized regarding...? ...quantified using?

Ok

P.5 L.35 ...allow a gradual increase... decrease?

Ok, we can rephrase putting "allowing a vertically smooth transition between mixed and stratified layers."

P.7 eq.1 I might be wrong but as written and with  $\sigma\text{-MLD} = 0.3$  the first term becomes negligible at the depth of 2 m

We surely clarify the formula: in particular, the denominator in the argument of the exponential is  $\sigma * \text{MLD}$ , in this way the MLD depth modulates the shape of the mixing profiles in terms of variance of the Gaussian.

P.9 L.5-10 The whole paragraph is a little confusing because the authors introduce the seasonal mixing due to destratification without clarifying that this is likely taken into account by the measured change of the MLD and not by their formulation of mixing (Eq. 1).

Clarifying the formula of Eq.1, as explained in the comment above, should make the paragraph more clear, in fact the variance of the Gaussian profile depends on the MLD.

P.10 L.29 remove as

Ok

Fig. 5 The legend could be compacted and the three figures could become one three multipanel figure

Ok, we will try to compact the figure, our only concern is related to readability of the panels if they become too small.

P.18 L.2 are hardly what? Constrained?

Hardly ever in a steady state condition. We mean that the system has time dependent forcing that prevent it to reach the steady state.

P.20 L.23-28 Do the authors implicitly assume that CDOM concentration is higher in the WMed? This could said more explicitly.

Yes, this assumption derives from the preliminary analysis we carried out on Ed 380 BGC-Argo float profiles, for which the  $K_d$  380 were derived. Since the diffusion attenuation coefficient as an apparent optical property depends more on the composition of the examined water body rather than the external light field, higher  $K_d$  values at that wavelength suggest a higher absorption, be it from CDOM and / or non-algal particles (NAP). From the same data set, after an extended analysis, it can be confirmed that a gradient in absorption between west and east Mediterranean is present.

P.27 L.12 The most fitting? May be: The best alternatives to fit the data.

Ok

REVIEWER #2

GENERAL COMMENTS

The authors used a number of vertical profiles from BIO ARGO floats (1314 profiles) in the Mediterranean and merged them with a one dimensional biogeochemical model. The aim of the study was to alter the optical component of the model and study the effect it has on model simulations, specifically on the chlorophyll profile. The authors also showed the effect vertical mixing has on the shape of the chlorophyll profiles. They have demonstrated that bio-optical data from the floats are useful not only for model data comparison, but also as forcing in the model, which in my take is the biggest plus of the work. I complement the authors on their effort combining the data with the model.

The work is well presented and concise. I think the manuscript is well suited to be published in this journal. My suggestion would be to expand some technical aspects, which I outline in more detail with specific comments. These comments are aimed mostly to expand the information in the text.

We thank the reviewer for the encouraging comments, below we reply to the points raised.

SPECIFIC COMMENTS

**R2.1**

P5 L30 How good is the matchup between the measured chlorophyll profiles and the modeled profiles taken for the initial conditions from the reanalysis?

The following scatter plot (Fig.R3) is the equivalent to the one used for the REF model validation but restricted to the initial values taken respectively from Reanalyses and the BGC-Argo float data. The number of samples is lower than in the case of the BGC-Argo float results, and therefore difficult to compare with the other scatter plot (Fig.R1). However, we may point out that model tends to overestimate the DCM position (Bias is approximately 7% of the mean DCM depth and the slope is 0.53). We will add this information to the revised manuscript.

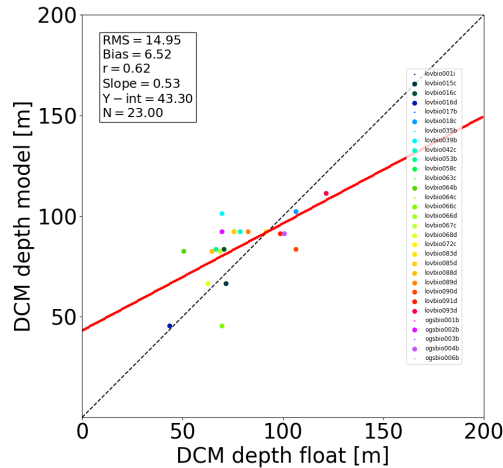

Fig. R3. Same as Fig. R1 (left panel) but only for initial conditions.

## R2.2

P5 L22 If I am correct the governing equations for photosynthesis can be found in Lazzari et al. (2012) Appendix B and the remaining equations in Supplementary material of that paper? Please indicate this in more details.

Ok, we propose to add a more clear reference: the equations are best summarized in the BFM manual where all the options including the ones used in the present simulation are reported. The supplementary material included in this manuscript contains the biogeochemical parameters that activate the correct options used in the present simulations.

## R2.3

P7 Perhaps writing a generic one dimensional equation for the vertical distribution of phytoplankton would be of some help to the non-expert readers of the paper. It would also help to elucidate the mathematical formulations of the various processes which are referred to later on in the text, such as mixing and light attenuation.

We agree with the reviewer. We plan to add the general mathematical equation applied to each tracer:

$$\partial_t C_i(z, t) = \partial_z [D_v(z, t) \partial_z C_i(z, t)] + v_{sink, i} \partial_z C_i(z, t) + BFM_i(T, S, PAR, \bar{C}(z, t))$$

where  $C_i$  are the biogeochemical tracers simulated ( $i=1,50$ ),  $D_v$  is the vertical eddy diffusivity derived from Eq.1 [reported in the first submission of the manuscript].  $v_{sink}$  is the sinking velocity,  $BFM_i$  is the reaction term due to biogeochemical processes for the tracer  $C_i$ .  $T$ ,  $S$ ,  $PAR$  are data measured by the BGC-Argo float.

## R2.4

P17 Secti 3.2 Some good references for this discussion are: Ryabov & Blasius (2014) The American Naturalist, Huisman et al. (2002) The American Naturalist, Huisman et al. (2004) Ecology, and one with a historical note: Ryabov & Blasius (2008) Mathematical Modelling of Natural Phenomena.

We agree to add these very useful references, in particular to comment the theoretical aspects of the simulated profiles.

## R2.5

P7 L19 Does this imply that you have also averaged measured chlorophyll in the 15 m depth intervals along with calculated  $K_d$  and then pared them up in the regression? Please clarify.

Yes we proceeded exactly in this way, we will specify this aspect in the revised manuscript.

## R2.6

P7 L24 Why are there brackets around  $\ln(E_d)$ ?

The brackets [] are a typo, we will correct it.

## R2.7

P9 Figure 2 The depth of the deep chlorophyll maximum is taken as a metric for the model and the model is proven to be very good at predicting the deep chlorophyll maximum depth. However, there are other measures beside this that can be used: surface chlorophyll concentration, chlorophyll concentration at the depth of the maximum and width of the profile. It would be interesting to see this comparison as a scatter plot.

Our initial idea to focus mainly on the shape of the profile was dictated by the complexity of the transformation of fluorescence profiles to chlorophyll concentration values. For this reason we thought that comparing the simulated DCM depth versus measurements was the most robust action to take. We already included an evaluation of the surface concentration for the stratified period to compare the effect of constant versus diel variation in PAR.

Following the reviewer's suggestions, we show also the DCM width and the DCM concentration. The DCM width is operationally defined by means of a Gaussian fit and the thickness is computed in the range  $\pm \sigma/2$  from the maximum.

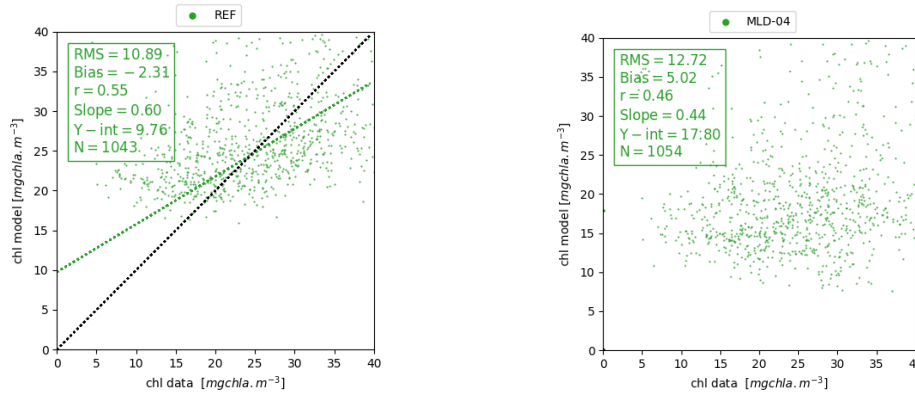

**Fig. R4.** Scatter plot of DCM thickness as defined in the text. Left panel reports REF simulation ( $D_{v\text{background}}=10^{-4} \text{ m}^2/\text{s}$ ), right panel shows MLD04 simulation ( $D_{v\text{background}}=10^{-6} \text{ m}^2/\text{s}$ ). The thickness is defined as  $\pm \sigma$  computed on the vertical profiles by means of a Gaussian fit.

As shown in Fig. R4, the correlation between model and observations DCM thickness is lower with respect to the DCM depth statistics. The model has a minimum thickness of approximately 15 meters, whilst data reach in some cases 5 meters. As explained in the first version of the paper, background diffusivity regulates the shape of relative maxima. Spatial variability of the background diffusivity coefficient ( $D_{v\text{background}}$ ) in the Mediterranean Sea could be responsible for the higher variability in the DCM thickness observed in data versus model. In the experiments considered as alternative MLD models (MLD01, MLD02, MLD03, MLD04), we changed the  $D_{v\text{background}}$  parameter for all the BGC-Argo floats for the same amount. The comparison between REF and MLD04 with extreme values of  $D_{v\text{background}}$  evidences how, on average, the DCM thickness reduces as diffusivity reduces (Fig. R4, right).

The case of the chlorophyll concentration in correspondence of the DCM is more complex. Measured chlorophyll concentration fluctuates in the DCM, and an investigation of the possible underlying mechanisms (e.g. presence of Rossby or Kelvin waves, or other non-linear effects) go beyond the scope of the present paper.

We show here the median chlorophyll in the DCM productive layer ( $\pm \sigma/2$ ) for each BGC-Argo float (Fig.R5). In general, simulations tend to underestimate chlorophyll concentration with respect to BGC-Argo floats in the western Mediterranean. In the first version of the manuscript we emphasized how nutrients control the biomass in the DCM productive layer. We evaluated the effects of perturbing nutrients for the BGC-Argo floats deployed in the West Mediterranean by increasing the  $\text{PO}_4$  concentration by a factor 2. The results are reported in Fig. R5.

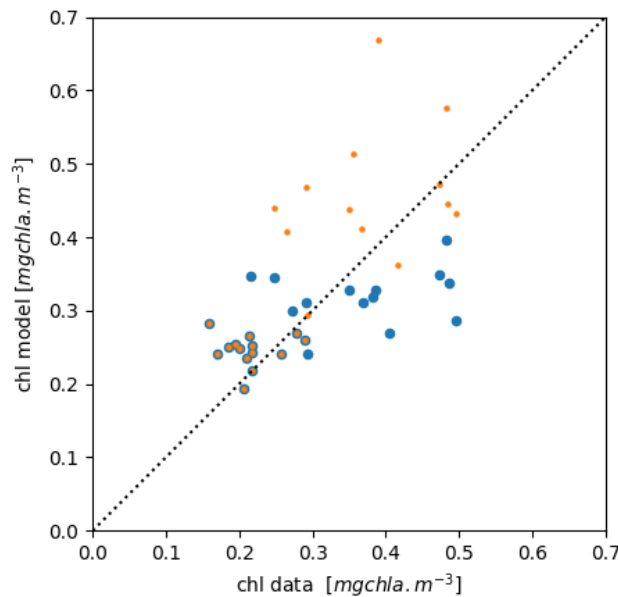

**Fig. R5.** Scatter plot of DCM chlorophyll concentration as defined in the text: median concentration of the REF (blue dots) and from the simulation increasing  $\text{PO}_4$  (orange dots).

The interesting result is that the skill in reproducing the DCM depth, Fig. R1(left), is almost the same between REF and REF with higher PO<sub>4</sub> (image not shown) so it could be possible to finely tune the initial conditions to maximize both the skills in terms of DCM value and DCM depth. But considering the fact that the measurements of concentration of chlorophyll as derived from fluorescence present some uncertainties we prefer to keep the initialization as based on reanalysis.

For a more detailed overview of the quality control procedure for fluorescence profiles, see Organelli et al. 2017 (<https://www.earth-syst-sci-data.net/9/861/2017/>) as a reference. We will underline this also in the following version of the manuscript.

## R2.8

P26 L8 Not quite sure if “irradiance propagation” is a correct term. Light propagates and irradiance is a measure of the light intensity per unit surface. Please change to “irradiance profile”.

Ok, we agree to substitute “irradiance propagation” with “irradiance profile”.

## R2.9

P26 L9 Change “position” to “depth”.

Ok.

## TECHNICAL CORRECTIONS

I have noticed that in some places units are written with superscript (e.g. m s<sup>-1</sup>) and in some with a slash (e.g. m/s). Please opt for one to be consistent.

Ok.

Also, in the figures chlorophyll concentration is written with small case letter c as “chl” and in the text it is written with capital letter C as “Chl”. Again, please opt for one to be consistent. I would advise “Chl”.

Ok, we will standardize the notation with Chl.

P6 Table 1 Wrong location of table caption. Should be above the table. P6 Table 2 Wrong location of table caption. Should be above the table. P3 L7 Units are in italics. Please change to upright. P3 L10 Units are in italics. Please change to upright. P7 L7 Missing full stop at the end of the sentence. P7 L16 Change “BCG-Argo” to “BGC-Argo”. P8 L22 Units are in italics. Please change to upright. P10 L6 Units are in italics. Please change to upright. P10 L18 Missing full stop after “sections”. P17 L9 Remove extra spacing before “where”. P26 L9 Change “what found” to “what was found” or “what has been found”.

Ok, we will apply the corrections listed above.
